# Supplementary material for: Tuning the performance of Pt–Ni alloy/reduced graphene oxide catalysts for 4-nitrophenol reduction
Source: Royal Society of Chemistry journal article supplement (doi:10.1039/c6ra16045j), 2016-01-01
Supplement: c6ra16045j1.pdf [file c6ra16045j1.pdf]

## Supporting Information

### Tuning the performance of Pt-Ni alloy/reduced graphene oxide catalysts for 4-nitrophenol reduction

Feng Zhao, Weixiao Kong, Zonggao Hu, Jindun Liu, Yafei Zhao,\* Bing Zhang\*

School of Chemical Engineering and Energy, Zhengzhou University, Zhengzhou

450001, P. R. China

\*Corresponding author. E-mail: zhaoyafei007@126.com (Y. Zhao),

zhangb@zzu.edu.cn (B. Zhang)

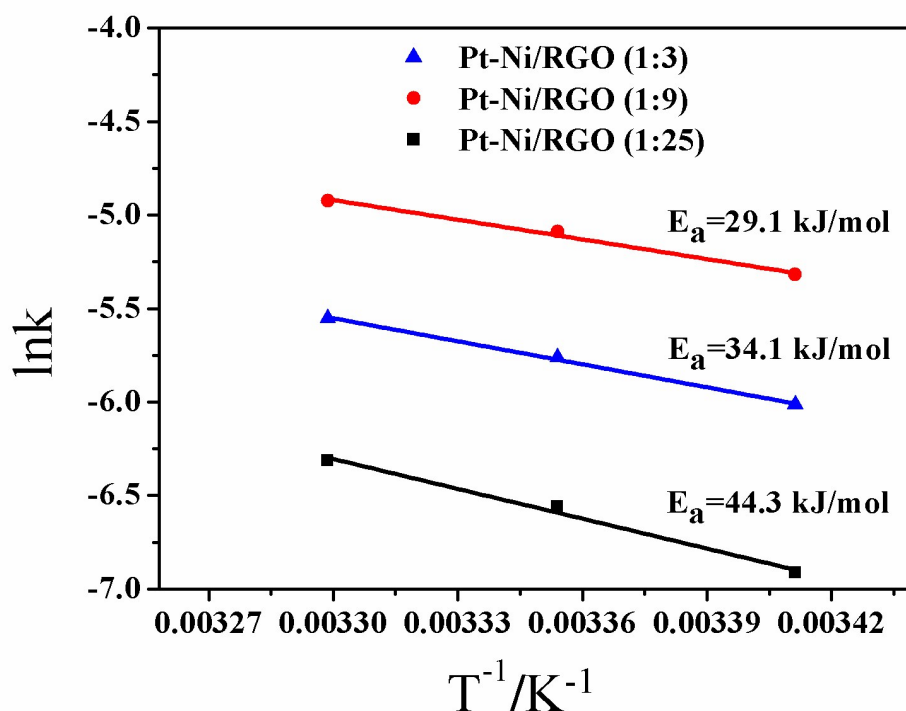

Fig. S1 Arrhenius plots for the reduction reaction catalysed by Pt-Ni/RGO nanocatalysts.

Table. S1 the apparent activation energy ( $E_a$ ) and pre-exponential factor (A) of the Pt-Ni/RGO nanocatalysts.

| catalysts        | $E_a$ (kJ/mol) | A ( $s^{-1}$ )      |
|------------------|----------------|---------------------|
| Pt-Ni/RGO (1:3)  | 34.1           | $2.96 \times 10^3$  |
| Pt-Ni/RGO (1:9)  | 29.1           | $0.78 \times 10^3$  |
| Pt-Ni/RGO (1:25) | 44.3           | $79.46 \times 10^3$ |
